# Supplementary material for: Combustion synthesis of porous Pt-functionalized SnO2 sheets for isopropanol gas detection with a significant enhancement in response
Source: Royal Society of Chemistry journal article supplement (doi:10.1039/c4ta04251d), 2014-01-01
Supplement: c4ta04251d1.pdf [file c4ta04251d1.pdf]

Electronic Supplementary Material (ESI) for J. Mater. Chem. A.  
This journal is © The Royal Society of Chemistry 2014

**Combustion synthesis of porous Pt-functionalized SnO<sub>2</sub> sheets for isopropanol gas detection with a significant enhancement in response**

Chengjun Dong<sup>a</sup>, Xu Li<sup>a</sup>, Xuechun Xiao<sup>a</sup>, Gang Chen<sup>a</sup>, Yude Wang,<sup>\*a</sup> and Igor Djerdj<sup>\*b</sup>

<sup>a</sup>*Department of Materials Science and Engineering, Yunnan University, 650091 Kunming, Peoples' Republic of China. Fax: +86-871-65153832; Tel: +86-871-65031124; E-mail: [ydwang@ynu.edu.cn](mailto:ydwang@ynu.edu.cn)*

<sup>b</sup>*Ruđer Bošković Institute, Bijenička 54, 10000 Zagreb, Croatia. Fax: +38514680114; Tel: +38514680113; E-mail: [igor.djerdj@irb.hr](mailto:igor.djerdj@irb.hr)*

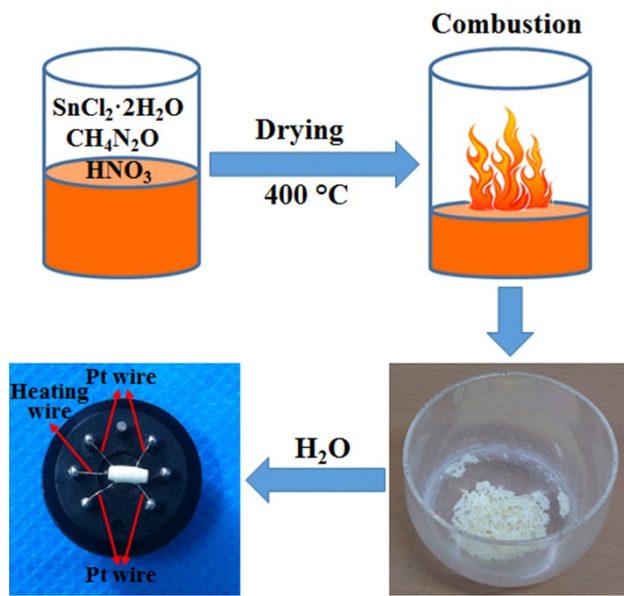

**Fig. S1** A schematic illustration of the preparation of porous SnO<sub>2</sub> sheets by a solution combustion synthesis and the assembling of the sensor.

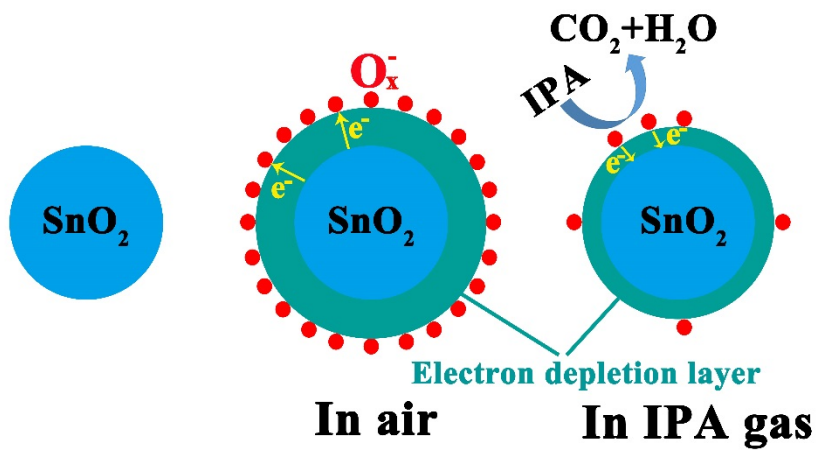

**Fig. S2** Schematic diagram of the mechanism for IPA gas sensing.

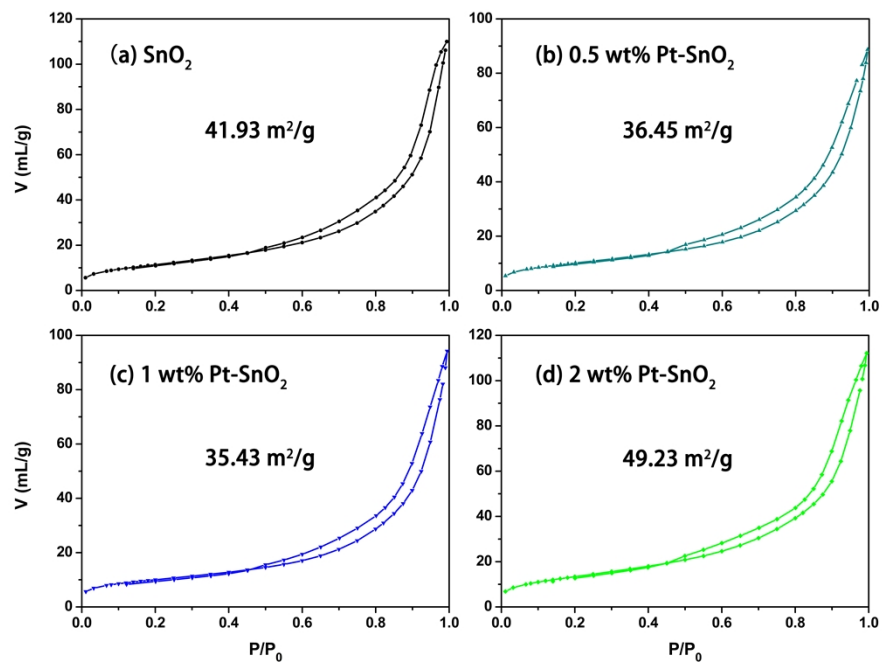

**Fig. S3** The nitrogen adsorption-desorption isothermal curves of the as-synthesized (a) pristine SnO<sub>2</sub>, (b) 0.5 wt% Pt-SnO<sub>2</sub>, (c) 1 wt% Pt-SnO<sub>2</sub>, and (d) 2 wt% Pt-SnO<sub>2</sub>, respectively.

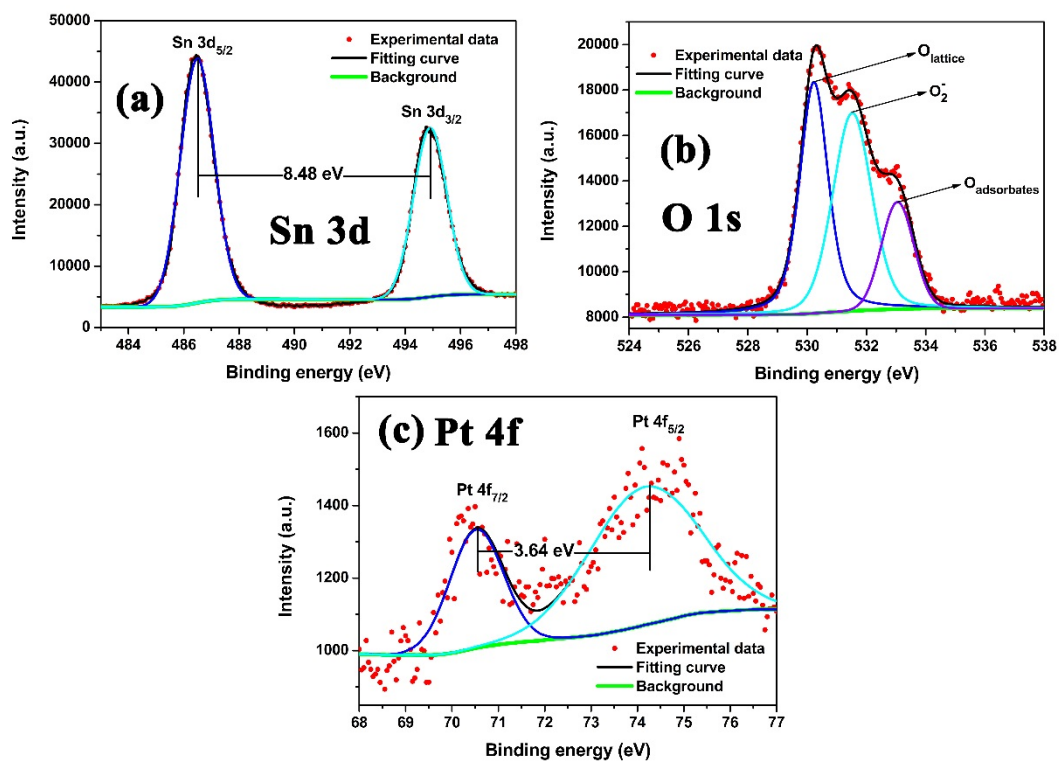

**Fig. S4** The high-resolution XPS survey spectra of (a) Sn 3d, (b) O 1s, and (c) Pt 4f in 2 wt% Pt- SnO<sub>2</sub>.
